# Supplementary material
Source: ML conference proceedings conference paper supplement (https://aclanthology.org/2020.insights-1.12)
Supplement: OptionalSupplementaryMaterial [file 2020.insights-1.12.OptionalSupplementaryMaterial.zip]

## Sheet: no hint
idx	input	target	output	score (3=perfect, 2=accpetable, 1=unacceptable)	reason
42	substitution statement 1: all cnidarians are aquatic . statement 2: cnidarians have a hydrostatic skeleton . </s>	some aquatic animals have hydrostatic skeletons . </s>	aquatic skeletons have hydrostatic skeletons.	1	conflicting information
76	substitution statement 1: skin color is another polygenic trait . statement 2: polygenic inheritance polygenic traits are controlled by an unknown number of genes . </s>	skin color is controlled by an unknown number of genes . </s>	skin color is controlled by an unknown number of genes.	3	exact match
98	substitution statement 1: when a gas in an open container evaporates , that gas spreads out into the air . statement 2: gases as well as vapours can contaminate the workplace air . </s>	when dangerous gas from an open container evaporates, it can contaminate a workplace . </s>	vapours can contaminate the workplace.	1	missing important elements	inferential knowledge!
102	substitution statement 1: when a gas in an open container evaporates , that gas spreads out into the air . statement 2: water vapor is a gas in the air . </s>	when water vapor in an open container evaporates , water vapor spreads out into the air . </s>	when a gas in an open container evaporates, it spreads out into the air	1	missing important elements
104	substitution statement 1: when a gas in an open container evaporates , that gas spreads out into the air . statement 2: deadly carbon monoxide gas from the generator s exhaust can spread throughout enclosed spaces . </s>	carbon monoxide gas from a generator's exhaust has been evaporated . </s>	when a generator in an open container evaporates, it can spread out into the air	incorrect combined fact
143	substitution statement 1: lymph is a fluid that leaks out of capillaries into spaces between cells . statement 2: capillaries are microscopic vessels . </s>	lymph is a fluid that leaks out of microscopic vessels into spaces between cells . </s>	lymph is a fluid that leaks out of microscopic vessels into spaces between cells	3	perfect
144	substitution statement 1: lymph is a fluid that leaks out of capillaries into spaces between cells . statement 2: bacteria invade lymph nodes, which swell, creating the buboes . </s>	swelling nodes leak fluid out of capillaries into spaces between cells . </s>	bacteria can swell.	1	not reasonable and missing important things
151	substitution statement 1: any antigen that causes an allergy is called an allergen . statement 2: asthma attacks are caused by allergies . </s>	allergens can trigger asthma attacks . </s>	asthma attacks can cause allergies.	1	the causal relationship is flipped.
210	substitution statement 1: if weather is stormy then there is a greater chance of rain . statement 2: rain is also known as precipitation . </s>	if weather is stormy then there is a greater chance of precipitation . </s>	if weather is stormy then there is greater chance of precipitation.	3	exact match. equivalence is easy
224	substitution statement 1: protozoa make humans sick when they become human parasites . statement 2: exhibit one-celled animals are called protozoa . </s>	one-celled animals make humans sick when they become parasites . </s>	one-celled animals make humans sick.	2	missing part of information: parasite	interesting thing: multiple possible substitution, will be relieved by adding hints
257	substitution statement 1: skin color is a polygenic trait . statement 2: polygenic traits are the result of the interaction of several genes . </s>	skin color is the result of the interaction of several genes . </s>	skin color is a result of the interaction of several genes.	3	exact match
266	substitution statement 1: pregnancy is the carrying of one or more offspring from fertilization until birth . statement 2: infertility is also the inability to carry a pregnancy to full term . </s>	carrying offspring to full term is from fertilization until birth . </s>	infertility is the carrying of one or more offspring from fertilization until birth	1	not reasonable at all
289	substitution statement 1: howling is used to warn other wolves by wolves . statement 2: like people, wolves are social . </s>	howling is used to warn other social animals . </s>	howling is used to warn other people to be social.	1	not reasonable at all
311	substitution statement 1: butter is a fat that is a solid at room temperature . statement 2: saturated fats are solid at room temperature . </s>	saturated fats make butter solid at ambient temperatures . </s>	butter is saturated fat.	1	missing important elements
318	substitution statement 1: bile reduces the acidity of food entering from the highly acidic stomach . statement 2: bile exits gallbladder by common bile duct . </s>	the gallbladder reduces the acidity of food entering from the highly acidic stomach . </s>	bile exits gallbladder.	1	not reasonable at all
324	substitution statement 1: bile reduces the acidity of food entering from the highly acidic stomach . statement 2: normally, bile acid pours into the stomach to help absorb fats from foods . </s>	bile absorbs fats . </s>	bile reduces the acidity of food entering from the highly acidic stomach to help	1	not reasonable
339	substitution statement 1: absorption of nutrients occurs mainly in the small intestine . statement 2: diarrhea reduces the absorption of all nutrients . </s>	diarrhea reduces funtcion that occurs mainly in the small intestine . </s>	diarrhea reduces the absorption of nutrients.	1	missing important elements
363	substitution statement 1: lightning can cause a forest fire . statement 2: all thunderstorms contain lightning . </s>	thunderstorms can cause forest fires . </s>	thunderstorms can cause a forest fire.	3	taxonomic relationship good.
367	substitution statement 1: lightning can cause a forest fire . statement 2: forest fires are examples of wildfires . </s>	wildfires are caused by lightning . </s>	lightning can cause wildfires.	3	semantically the same. Taxonomic relationship
395	substitution statement 1: mutualism is a symbiotic relationship in which both species benefit . statement 2: domestication of animals is an example of a symbiotic relationship . </s>	domestication of animals is an example of mutualism . </s>	domestication of animals is an example of mutualism.	3	perfect match
415	substitution statement 1: phylogeny is the evolutionary history of a group of related organisms . statement 2: metazoan phylogeny phylogeny of phyla is poorly understood . </s>	the evolutionary history of metazoas is poorly understood . </s>	metazoan is poorly understood.	problematic data
431	substitution statement 1: a speedometer is used for giving a driver feedback on the speed of their vehicle . statement 2: trucks and cars are vehicles . </s>	a speedometer is used for giving a driver feedback on the speed of their truck . </s>	a speedometer is used for giving a driver feedback on the speed of their trucks	3	perfect
445	substitution statement 1: when a hurricane moves over land , that hurricane will decrease in strength . statement 2: hurricanes a hurricane is a type of tropical cyclone . </s>	when a tropical cyclone moves over land, it will decrease in strength . </s>	when a tropical cyclone moves over land, that tropical cyclone will decrease in	1	severe grammatical issue.
484	substitution statement 1: a spider web is used to capture food by spiders . statement 2: web spinning spiders spin webs to catch insects . </s>	spiders catch insects by spinning . </s>	spiders use webs to capture food.	1	missing important information
489	substitution statement 1: a spider web is used to capture food by spiders . statement 2: larger numbers of spiders and spider webs means there are many insects available for food . </s>	a spider web is used to capture insects by spiders . </s>	spiders capture food.	1	missing important elements
498	substitution statement 1: protozoa can be classified on the basis of how they move . statement 2: cryptosporidium parvum is the hardest protozoa to kill . </s>	animals like cyptosporidium are often classified on how they move . </s>	cryptosporidium parvum can be classified on the basis of how they move.	3	semantically the same
517	substitution statement 1: bees convert nectar into honey . statement 2: nectar is in flowers, trees and hummingbird feeders . </s>	bees gather material to make honey from flowers and trees . </s>	bees convert flowers into honey.	2	not perfect but acceptable.
524	substitution statement 1: mountains are formed by earthquakes . statement 2: earthquakes are caused by movement of the tectonic plates . </s>	mountains are formed by movement of the tectonic plates . </s>	mountains are formed by movement of the tectonic plates.	3	perfect
546	substitution statement 1: whiskers are used for feeling by animals . statement 2: whiskers whiskers are the stiff hairs on the dog's face . </s>	stiff hairs on the face are used for feeling by animals . </s>	stiff hairs on the dog's face are used for feeling by animals.	2	is more specific than the gold fact
574	substitution statement 1: fluoride decreases tooth decay . statement 2: tooth decay can be very painful, and can make teeth unsightly . </s>	fluoride decreases the potential for tooth pain . </s>	fluoride can make teeth unsightly.	1	not reasonable
598	substitution statement 1: ancestors of hagfish are thought to have been the earliest vertebrates . statement 2: vertebrates are animals with backbones . </s>	ancestors of hagfish are thought to have been the earliest animals with backbones . </s>	hagfish have backbones.	2	missing some information
617	substitution statement 1: when a metal rusts , that metal becomes orange on the surface . statement 2: iron oxide is rust . </s>	when a metal contains iron oxide, it becomes orange on the surface . </s>	iron oxide becomes orange on the surface.	3	semantically the same
626	substitution statement 1: when sound reaches the ear , that sound can be heard . statement 2: nevertheless, the sharpest sounds are perceived in the brain . </s>	noise is processed when it reaches the brain . </s>	when the sharpest sounds reaches the ear, the sharpest are perceived in the brain	problematic data
634	substitution statement 1: measuring the hardness of minerals requires scratching those materials . statement 2: for ranking the hardness of minerals, the mohs scale is generally used . </s>	scratching a mineral allows one to determine the ranking on the mohs scale . </s>	the mohs scale is used for ranking minerals.	2	missing some information
656	substitution statement 1: satellites are used to take images from space . statement 2: satellite images are digital photographs . </s>	satellites are used to take digital photographs from space . </s>	digital photographs are used to take images from space.	1	not reasonable at all
701	substitution statement 1: loss of ozone has created an ozone hole over antarctica . statement 2: antarctica's ozone layer is threatened by depletion . </s>	loss of ozone can mean an ozone hole . </s>	depletion has created an ozone hole.	problematic data	This is an interesting example: the model does better than the data.
723	substitution statement 1: infancy is the period of most rapid growth after birth . statement 2: learning begins in infancy . </s>	after birth, learning begins . </s>	learning begins in the period of most rapid growth after birth.	3	semantically the same
748	substitution statement 1: milk is a nutritious fluid . statement 2: milk shakes have milk . </s>	milkshakes are a nutritious fluid . </s>	shakes are a nutritious fluid.	2	almost good
774	substitution statement 1: puberty is the period during which humans become sexually mature . statement 2: breasts develop during puberty . </s>	the breasts develop during the period when humans become sexually mature . </s>	breasts develop during the period during which humans become sexually mature.	3	semantically the same
777	substitution statement 1: a circle graph can be used to display percents . statement 2: fractions are sometimes expressed as a percent . </s>	a circle graph can be used to display fractions . </s>	a circle graph can be used to display fractions.	3	exact match
803	substitution statement 1: satellite technology is used for predicting the weather . statement 2: today, technology has helped meteorologists to detect tornadoes . </s>	meteorologists use satellites to detect tornadoes . </s>	satellite technology is used for predicting tornadoes.	2	missing some information
819	substitution statement 1: safety goggles are used for protecting the eyes during experiments . statement 2: safety goggles are mandatory in the laboratory . </s>	experiments are performed in the laboratory . </s>	safety goggles are mandatory in the laboratory.	1	missing important elements
830	substitution statement 1: cnidarians are invertebrates such as jellyfish and corals . statement 2: invertebrates have no vertebrae or backbone . </s>	jellyfish and corals have no vertebrae or backbone . </s>	jellyfish and coral have no backbones.	3	good
850	substitution statement 1: hermit crabs use the shells of dead snails for homes . statement 2: students live at home or in group homes . </s>	hermits crabs use dead snails shells as their place to live . </s>	hermit crabs use shells of dead snails for group homes.	3	semantically the same
865	substitution statement 1: volcanic ash in the atmosphere decreases the temperature by blocking the sun . statement 2: ash clouds are a particular problem for aircraft . </s>	volcanic clouds in the atmosphere is a particular problem for aircraft . </s>	volcanic clouds in the atmosphere decreases the temperature by blocking the sun.	1	missing important information
871	substitution statement 1: a seismograph is used for measuring the size of an earthquake . statement 2: magnitude a measure of earthquake size . </s>	a seismograph measures the magnitude of earthquakes . </s>	a seismograph is used for measuring the magnitude of an earthquake.	3	semantically the same
912	substitution statement 1: a stopwatch is used to measure time . statement 2: all times are measured in seconds . </s>	a stopwatch is used to measure seconds . </s>	a stopwatch is used to measure seconds.	3	exact matches
914	substitution statement 1: kidney failure may be treated with dialysis . statement 2: dialysis dialysis is a way of cleaning the blood with an artificial kidney . </s>	kidney failure may be treated by cleaning the blood with an artificial kidney . </s>	kidney failure may be treated with a way of cleaning the blood.	2	missing some but generally good
921	substitution statement 1: kidney failure may be treated with dialysis . statement 2: dialysis dialysis is a way of cleaning the blood with an artificial kidney . </s>	kidney failure may be treated by cleaning the blood with an artificial kidney . </s>	kidney failure may be treated with a way of cleaning the blood.	problematic data
924	substitution statement 1: kidney failure may be treated with dialysis . statement 2: kidney failure is a death sentence . </s>	a lack of dialysis may lead to death . </s>	death sentence may be treated with dialysis.	1	not reasonable at all
3	substitution statement 1: climate is generally described in terms of temperature and moisture . statement 2: climate change is a global problem . </s>	temperature and moisture is changing globally . </s>	global warming is generally described in terms of temperature and moisture.	1	different meaning. "warming" comes from nowhere.
10	substitution statement 1: a vehicle is used for transportation . statement 2: passenger vehicles are the primary mode of transportation . </s>	passenger cars are used for transportation . </s>	passenger vehicles are used for transportation.	3	semantically the same.
23	substitution statement 1: collar cells have tiny hairs that trap the particles . statement 2: some cells have tiny hair-like fibers that are called flagella . </s>	collar cells have flagella that trap the particles . </s>	collar cells have hairs that trap the particles.	1	missing important elements
27	substitution statement 1: collar cells have tiny hairs that trap the particles . statement 2: collar cells each have a flagellum . </s>	flagellum are tiny hairs that trap particles . </s>	flagellums have tiny hairs that trap the particles.	1	not meaningful, wrong relationship.
30	substitution statement 1: all cnidarians are aquatic . statement 2: aquatic creatures live in the water, for example . </s>	all cnidarians live in water . </s>	cnidarians live in the water.	3	semantically the same
32	substitution statement 1: all cnidarians are aquatic . statement 2: aquatic creatures live in the water, for example . </s>	all cnidarians live in the water . </s>	cnidarians live in the water.	problematic data
66	substitution statement 1: friction is used for stopping a vehicle by brakes . statement 2: friction produces heat . </s>	stopping a vehicle with brakes will generate heat . </s>	brakes produce heat.	2	missing some but generally good.
100	substitution statement 1: when a gas in an open container evaporates , that gas spreads out into the air . statement 2: evaporation is when a liquid turns into a gas . </s>	when a liquid turns into a gas in an open container, it spreads out into the air . </s>	when a liquid turns into a gas, it spreads out into the air.	3	perfect
110	substitution statement 1: bone is less flexible than cartilage but stronger . statement 2: cartilage is more flexible and lighter in weight than bone . </s>	bone is stronger and more rigid than cartilage . </s>	bone is lighter in weight than bone.	1	not meaningful, wrong relationship.
126	substitution statement 1: rna is a small molecule that can squeeze through pores in the nuclear membrane . statement 2: nuclear membranes are thickened, rounded and slightly irregular . </s>	rna is a small molecule that can squeeze through thickened, rounded and slightly irregular pores . </s>	rna can squeeze through pores.	1	missing important elements
145	substitution statement 1: lymph is a fluid that leaks out of capillaries into spaces between cells . statement 2: lymph nodes, or glands, filter the lymph fluid . </s>	lymph is filtered by nodes . </s>	glands filter fluid that leaks out of capillaries into spaces between cells.	problematic data
225	substitution statement 1: protozoa make humans sick when they become human parasites . statement 2: malaria parasites are transmitted by mosquitos . </s>	malaria is a protozoa that make humans sick . </s>	malaria is transmitted by mosquitoes.	problematic data
232	substitution statement 1: natural magnetism is used for pointing north by a compass . statement 2: compasses point to the magnetic poles . </s>	natural magnetism is used to point to the magnetic poles . </s>	compasses point to the poles.	1	missing important elements
238	substitution statement 1: nonmetal elements are far fewer in number . statement 2: each element is either a metal, nonmetal, or metalloid . </s>	elements that are not metal or metalloid are far fewer in number . </s>	metalloids are far fewer in number.	1	does not make sense
245	substitution statement 1: blood type is important for medical reasons . statement 2: blood type is determined by inherited antigens and antibodies . </s>	inherited antigens and antibodies are important for medical reasons . </s>	antibodies are determined by antigens.	1	does not make sense
249	substitution statement 1: scientists still know relatively little about archaea . statement 2: scientist do research every year . </s>	people that do research still know relatively little about archaea . </s>	archaea still know relatively little about archaea.	1	does not make sense
274	substitution statement 1: some pelycosaurs gave rise to a group of animals called therapsids . statement 2: pelycosaurs are an important lineage preserved in the fossil record . </s>	the fossil record shows the lineage of therapsids . </s>	some animals have a lineage preserved in the fossil record.	problematic data
285	substitution statement 1: howling is used to warn other wolves by wolves . statement 2: wolves communicate with each other using the different pitches of their howl . </s>	wolves warn other wolves by using different pitches . </s>	howling is used to warn other wolves.	1	missing important elements
343	substitution statement 1: absorption of nutrients occurs mainly in the small intestine . statement 2: dozens of drugs inhibit nutrient absorption or deplete nutrients . </s>	many drugs can inhibit the actions of the small intestine . </s>	drugs inhibit nutrient absorption.	1	missing important elements
409	substitution statement 1: adolescence is the last stage of life before adulthood . statement 2: adolescence begins with puberty . </s>	puberty begins the last stage of life before adulthood . </s>	puberty is the last stage of life before adulthood.	1	the meaning is not correct.
411	substitution statement 1: adolescence is the last stage of life before adulthood . statement 2: adolescence is a pivotal stage of human development . </s>	the last stage before adulthood is a pivotal later stage of human development . </s>	the last stage of human development is the last stage of life before adulthood.	1	the meaning is not correct.
421	substitution statement 1: a speedometer is used for giving a driver feedback on the speed of their vehicle . statement 2: speedometer now shows maximum speed of 90 mph . </s>	speedometer shows the driver the vehicle's mph . </s>	a speedometer is used for giving a driver feedback on the speed of their vehicle	1	the meaning is not correct.
456	substitution statement 1: a compass is used to navigate oceans . statement 2: on moonless nights they navigate solely with the geomagnetic compass . </s>	oceans can be navigated even on moonless nights . </s>	geomagnetic compass is used to navigate oceans.	1	missing important elements
467	substitution statement 1: a compass is used to navigate oceans . statement 2: large ocean-going vessels use a gyrocompass as their steering compass . </s>	compasses are used for steering . </s>	large vessels navigate oceans.	1	valid, but missed the target.
472	substitution statement 1: precipitation increases moisture . statement 2: rain is liquid precipitation . </s>	rain increases moisture . </s>	rain increases moisture.	3
480	substitution statement 1: a spider web is used to capture food by spiders . statement 2: black widow spiders construct funnel-shaped webs . </s>	black widows use webs to capture food . </s>	black widows use webs to capture food.	3
485	substitution statement 1: a spider web is used to capture food by spiders . statement 2: spider spiders have eight legs . </s>	webs are built to capture food by eight legged creatures . </s>	spiders have eight legs to capture food.	1	not meaningful
510	substitution statement 1: bees convert nectar into honey . statement 2: honey bees are very social in that they all live together in home, or apiary . </s>	nectar is converted into honey in an apiary . </s>	bees convert nectar into apiary.	1	not meaningful
528	substitution statement 1: mountains are formed by earthquakes . statement 2: earthquakes earthquakes are the results of moving plates . </s>	mountains are formed by moving plates . </s>	mountains are formed by moving plates.	3
536	substitution statement 1: chemical digestion occurs mainly in the small intestine . statement 2: chemical digestion breaks complex chemicals into simple ones . </s>	breaking complex chemicals into simple ones occurs mainly in the small intestine . </s>	complex chemicals break into simple ones.	1	missing important elements
570	substitution statement 1: any surface that has not been sterilized is likely to be covered with bacteria . statement 2: bacteria are the smallest of microscopic organisms . </s>	any surface that has not been sterilized is likely to be covered with microscopic organisms . </s>	any surface that has not been sterilized is likely to be covered with microscopic organism	3
585	substitution statement 1: differentiation is the process by which unspecialized cells become specialized . statement 2: cells are the basic unit of life . </s>	differentiation is the process by which unspecialized basic units of life become specialized . </s>	differentiation is the process by which cells become specialized.	1	missing important elements
597	substitution statement 1: ancestors of hagfish are thought to have been the earliest vertebrates . statement 2: vertebrates are animals with backbones . </s>	ancestors of hagfish are thought to have been the earliest animals with backbones . </s>	hagfish have backbones.	2	missing some information
614	substitution statement 1: when a metal rusts , that metal becomes orange on the surface . statement 2: rust stains are the result of oxidation . </s>	metal becomes orange on the surface as a result of oxidation . </s>	when a metal stains, it becomes orange.	1	missing important information
640	substitution statement 1: measuring the hardness of minerals requires scratching those materials . statement 2: calcite is a very common mineral . </s>	measuring the hardness of calcite requires scratching those materials . </s>	calcite is measured hardness.	1	not meaningful
658	substitution statement 1: seat belts are used for preventing injuries to passengers in cars . statement 2: seat belts save lives . </s>	preventing injuries to passengers in cars saves lives . </s>	cars save lives.	1	not meainingful
702	substitution statement 1: loss of ozone has created an ozone hole over antarctica . statement 2: another sign of global warming is a hole in the ozone layer over antarctica . </s>	global warming has created an ozone hole . </s>	loss of ozone has created a sign of global warming.	2	not perfect, but not unreasonable.
704	substitution statement 1: loss of ozone has created an ozone hole over antarctica . statement 2: ozone ozone is a natural component of the atmosphere . </s>	loss of a natural component of the atmosphere has created a hole over antarctica . </s>	loss of ozone has created an ozone hole over antarctica.	1	missing important elements
740	substitution statement 1: food is easier to chew because it is moistened by saliva from the salivary glands . statement 2: brain food bagels are brain food . </s>	bagels get easier to chew by being moistened by saliva from the salivary glands . </s>	bagels are easier to chew because it is moistened by saliva from the salivary gland	3	semantically the same
751	substitution statement 1: birth may be followed by a period of parental care of the offspring . statement 2: parents take care of children . </s>	birth may be followed by parental nurturing . </s>	birth may be followed by a period of parental care of the offspring.	problematic data
779	substitution statement 1: a circle graph can be used to display percents . statement 2: percents are decimal fractions . </s>	circle graphs can be used to show decimal fractions . </s>	a circle graph can be used to display decimal fractions.	3	perfect
784	substitution statement 1: a circle graph can be used to display percents . statement 2: percents are decimal fractions . </s>	a circle graph can be used to display decimal fractions . </s>	a circle graph can be used to display decimal fractions.	problematic data
822	substitution statement 1: safety goggles are used for protecting the eyes during experiments . statement 2: eyes eyes eyes are probably the most important symbolic sensory organ . </s>	sensory organs can be protected by safety goggles during experiments . </s>	safety goggles are used for protecting the most important symbolic organ during experiments.	3	semantically perfect
823	substitution statement 1: safety goggles are used for protecting the eyes during experiments . statement 2: safety goggles are mandatory in the laboratory . </s>	protection for the eyes is mandatory in the laboratory . </s>	safety goggles are mandatory in the laboratory.	1	missing important elements
825	substitution statement 1: safety goggles are used for protecting the eyes during experiments . statement 2: safety glasses and goggles protect the eyes . </s>	safety glasses are used for protecting the eyes during experiments . </s>	glasses protect the eyes during experiments.	1	not very reasonable and missing important parts.
828	substitution statement 1: cnidarians are invertebrates such as jellyfish and corals . statement 2: cnidarians are entirely aquatic animals . </s>	jellyfish are an aquatic invertebrate . </s>	jellyfish are entirely aquatic animals.	problematic data
852	substitution statement 1: hermit crabs use the shells of dead snails for homes . statement 2: gastropods are snails and slugs . </s>	hermit crabs use shells of gastropods for homes . </s>	hermit crabs use shells of gastropods for homes.	3
867	substitution statement 1: volcanic ash in the atmosphere decreases the temperature by blocking the sun . statement 2: or a veil of tiny particles from a volcanic eruption can block the sun . </s>	volcanoes can block the sun . </s>	a veil of tiny particles in the atmosphere decreases the temperature.	problematic data
902	substitution statement 1: fingernails prevent injury by forming protective plates over the ends of the fingers . statement 2: fingernails are also made of keratin . </s>	keratin prevents injury by forming protective plates over the ends of the fingers . </s>	keratin prevent injury by forming protective plates over the ends of the fingers.	3
916	substitution statement 1: kidney failure may be treated with dialysis . statement 2: dialysis is a procedure to filter the blood . </s>	kidney failure may be treated with a procedure to filter the blood . </s>	kidney failure may be treated with a procedure to filter blood.	3
	split 1	split 2	total
total	50	50	100
problematic	5	8	13
perfect	18	13	31
acceptable	8	3	11
unacceptable	19	26	45

## Sheet: hint
idx	input	target	output	score (3=perfect, 2=accpetable, 1=unacceptable)	reason
42	substitution statement 1: all cnidarians are aquatic . statement 2: cnidarians have a hydrostatic skeleton . hint: a are aquatic hydrostatic . </s>	some aquatic animals have hydrostatic skeletons . </s>	all aquatic animals have a hydrostatic skeleton.	1	not reasonable	quantifier
76	substitution statement 1: skin color is another polygenic trait . statement 2: polygenic inheritance polygenic traits are controlled by an unknown number of genes . hint: is controlled genes by skin color . </s>	skin color is controlled by an unknown number of genes . </s>	skin color is controlled by genes.	2	missing some information
98	substitution statement 1: when a gas in an open container evaporates , that gas spreads out into the air . statement 2: gases as well as vapours can contaminate the workplace air . hint: the container open gas workplace an . </s>	when dangerous gas from an open container evaporates, it can contaminate a workplace . </s>	gas in an open container can cause contamination to the workplace.	3	semantically the same
102	substitution statement 1: when a gas in an open container evaporates , that gas spreads out into the air . statement 2: water vapor is a gas in the air . hint: water vapor air the open out into an in . </s>	when water vapor in an open container evaporates , water vapor spreads out into the air . </s>	water vapor spreads out into the air in an open container.	2	missing some information
104	substitution statement 1: when a gas in an open container evaporates , that gas spreads out into the air . statement 2: deadly carbon monoxide gas from the generator s exhaust can spread throughout enclosed spaces . hint: from a carbon gas monoxide exhaust . </s>	carbon monoxide gas from a generator's exhaust has been evaporated . </s>	carbon monoxide gas from the exhaust can spread out.	problematic
143	substitution statement 1: lymph is a fluid that leaks out of capillaries into spaces between cells . statement 2: capillaries are microscopic vessels . hint: lymph fluid spaces of cells between microscopic vessels out into . </s>	lymph is a fluid that leaks out of microscopic vessels into spaces between cells . </s>	lymph is a fluid that leaks out of microscopic vessels into spaces between cells	3	perfect match
144	substitution statement 1: lymph is a fluid that leaks out of capillaries into spaces between cells . statement 2: bacteria invade lymph nodes, which swell, creating the buboes . hint: fluid spaces of cells between out into capillaries . </s>	swelling nodes leak fluid out of capillaries into spaces between cells . </s>	fluid that leaks out of capillaries into spaces between cells can leak out of space between	1	not reasonable at all	need additional commonsense knowledge and hypothesis
151	substitution statement 1: any antigen that causes an allergy is called an allergen . statement 2: asthma attacks are caused by allergies . hint: attacks by asthma . </s>	allergens can trigger asthma attacks . </s>	asthma attacks are caused by allergies.	1	missing important information	the structure is complex
210	substitution statement 1: if weather is stormy then there is a greater chance of rain . statement 2: rain is also known as precipitation . hint: stormy is greater weather there of a chance precipitation . </s>	if weather is stormy then there is a greater chance of precipitation . </s>	if weather is stormy then there is a greater chance of precipitation.	3	perfect match
224	substitution statement 1: protozoa make humans sick when they become human parasites . statement 2: exhibit one-celled animals are called protozoa . hint: animals when become one-celled humans make parasites they sick . </s>	one-celled animals make humans sick when they become parasites . </s>	one-celled animals make humans sick when they become human parasites.	3	perfect match
257	substitution statement 1: skin color is a polygenic trait . statement 2: polygenic traits are the result of the interaction of several genes . hint: is genes of the result several skin color interaction . </s>	skin color is the result of the interaction of several genes . </s>	skin color is the result of the interaction of several genes.	3	perfect match
266	substitution statement 1: pregnancy is the carrying of one or more offspring from fertilization until birth . statement 2: infertility is also the inability to carry a pregnancy to full term . hint: carrying is from to offspring until term birth full fertilization . </s>	carrying offspring to full term is from fertilization until birth . </s>	carrying offspring from fertilization until birth is full term.	3	semantically the same
289	substitution statement 1: howling is used to warn other wolves by wolves . statement 2: like people, wolves are social . hint: is howling other social used warn to . </s>	howling is used to warn other social animals . </s>	howling is used to warn other social people.	1	not reasonable	statement 2 is complex, and need commonsense knowledge
311	substitution statement 1: butter is a fat that is a solid at room temperature . statement 2: saturated fats are solid at room temperature . hint: saturated butter solid fats at temperature . </s>	saturated fats make butter solid at ambient temperatures . </s>	butter is a fat that is solid at room temperature.	1	not reasonable	need reasonable hypothesis with commonsense
318	substitution statement 1: bile reduces the acidity of food entering from the highly acidic stomach . statement 2: bile exits gallbladder by common bile duct . hint: entering from acidic stomach of the reduces highly food acidity gallbladder . </s>	the gallbladder reduces the acidity of food entering from the highly acidic stomach . </s>	ducts exit gallbladder reduce the acidity of food entering from the highly acid	1	not reasonable and severe grammatical issues	need commonsense when generation
324	substitution statement 1: bile reduces the acidity of food entering from the highly acidic stomach . statement 2: normally, bile acid pours into the stomach to help absorb fats from foods . hint: bile absorb fats . </s>	bile absorbs fats . </s>	bile helps absorb fats.	3	semantically the same
339	substitution statement 1: absorption of nutrients occurs mainly in the small intestine . statement 2: diarrhea reduces the absorption of all nutrients . hint: occurs small mainly the diarrhea reduces in intestine . </s>	diarrhea reduces funtcion that occurs mainly in the small intestine . </s>	diarrhea reduces the amount of food that occurs mainly in the small intestine.	1	not reasonable	composition, adding description text, and need summarization
363	substitution statement 1: lightning can cause a forest fire . statement 2: all thunderstorms contain lightning . hint: cause forest can . </s>	thunderstorms can cause forest fires . </s>	thunderstorms can cause forest fires.	3	perfect match
367	substitution statement 1: lightning can cause a forest fire . statement 2: forest fires are examples of wildfires . hint: lightning wildfires . </s>	wildfires are caused by lightning . </s>	lightning can cause wildfires.	3	semantically the same
395	substitution statement 1: mutualism is a symbiotic relationship in which both species benefit . statement 2: domestication of animals is an example of a symbiotic relationship . hint: is animals mutualism of domestication example an . </s>	domestication of animals is an example of mutualism . </s>	mutualism is an example of domestication of animals.	1	not reasonable. Flipped relationship	relationship flipped.
415	substitution statement 1: phylogeny is the evolutionary history of a group of related organisms . statement 2: metazoan phylogeny phylogeny of phyla is poorly understood . hint: is evolutionary understood history poorly . </s>	the evolutionary history of metazoas is poorly understood . </s>	the evolutionary history of a group of related organisms is poorly understood.	problematic
431	substitution statement 1: a speedometer is used for giving a driver feedback on the speed of their vehicle . statement 2: trucks and cars are vehicles . hint: is speed giving for a on driver feedback used trucks speedometer . </s>	a speedometer is used for giving a driver feedback on the speed of their truck . </s>	a speedometer is used for giving a driver feedback on the speed of trucks.	3	semantically the same
445	substitution statement 1: when a hurricane moves over land , that hurricane will decrease in strength . statement 2: hurricanes a hurricane is a type of tropical cyclone . hint: tropical when moves strength over land cyclone in . </s>	when a tropical cyclone moves over land, it will decrease in strength . </s>	when a tropical cyclone moves over land, it will decrease in strength.	3	perfect match
484	substitution statement 1: a spider web is used to capture food by spiders . statement 2: web spinning spiders spin webs to catch insects . hint: spiders insects catch . </s>	spiders catch insects by spinning . </s>	spiders catch insects.	1	missing important information	composition
489	substitution statement 1: a spider web is used to capture food by spiders . statement 2: larger numbers of spiders and spider webs means there are many insects available for food . hint: is capture spiders webs insects by used to . </s>	a spider web is used to capture insects by spiders . </s>	spider webs are used to capture insects by spiders.	3	semantically the same
498	substitution statement 1: protozoa can be classified on the basis of how they move . statement 2: cryptosporidium parvum is the hardest protozoa to kill . hint: move how classified can they be . </s>	animals like cyptosporidium are often classified on how they move . </s>	cryptosporidium parvum can be classified on the basis of how they move.	3	semantically the same
517	substitution statement 1: bees convert nectar into honey . statement 2: nectar is in flowers, trees and hummingbird feeders . hint: and trees honey bees . </s>	bees gather material to make honey from flowers and trees . </s>	bees convert trees and honey into honey.	1	not reasonable enough	composition, and need summarization
524	substitution statement 1: mountains are formed by earthquakes . statement 2: earthquakes are caused by movement of the tectonic plates . hint: plates movement of the formed are by mountains tectonic . </s>	mountains are formed by movement of the tectonic plates . </s>	mountains are formed by movement of the tectonic plates.	3	perfect match
546	substitution statement 1: whiskers are used for feeling by animals . statement 2: whiskers whiskers are the stiff hairs on the dog's face . hint: animals feeling for hairs the are stiff face on by used . </s>	stiff hairs on the face are used for feeling by animals . </s>	the stiff hairs on the dog's face are used for feeling by animals.	2	acceptable
574	substitution statement 1: fluoride decreases tooth decay . statement 2: tooth decay can be very painful, and can make teeth unsightly . hint: fluoride tooth can . </s>	fluoride decreases the potential for tooth pain . </s>	fluoride can prevent tooth decay.	1	missing important information	need to create new words to make the new statement makes sense
598	substitution statement 1: ancestors of hagfish are thought to have been the earliest vertebrates . statement 2: vertebrates are animals with backbones . hint: hagfish been animals thought of the ancestors are backbones with earliest have to . </s>	ancestors of hagfish are thought to have been the earliest animals with backbones . </s>	ancestors of hagfish are thought to have been the earliest animals with back	2	almost good
617	substitution statement 1: when a metal rusts , that metal becomes orange on the surface . statement 2: iron oxide is rust . hint: surface iron oxide the metal on orange . </s>	when a metal contains iron oxide, it becomes orange on the surface . </s>	iron oxide becomes orange on the surface.	3	semantically the same
626	substitution statement 1: when sound reaches the ear , that sound can be heard . statement 2: nevertheless, the sharpest sounds are perceived in the brain . hint: reaches when brain the . </s>	noise is processed when it reaches the brain . </s>	when the brain reaches the ear, it can be heard.	problematic
634	substitution statement 1: measuring the hardness of minerals requires scratching those materials . statement 2: for ranking the hardness of minerals, the mohs scale is generally used . hint: scale the requires mohs scratching . </s>	scratching a mineral allows one to determine the ranking on the mohs scale . </s>	the mohs scale requires scratching.	1	missing important information	commonsense knowledge is needed for generation
656	substitution statement 1: satellites are used to take images from space . statement 2: satellite images are digital photographs . hint: from take space used are digital satellites photographs to . </s>	satellites are used to take digital photographs from space . </s>	satellites are used to take digital photographs from space.	3	perfect match
701	substitution statement 1: loss of ozone has created an ozone hole over antarctica . statement 2: antarctica's ozone layer is threatened by depletion . hint: of hole loss ozone . </s>	loss of ozone can mean an ozone hole . </s>	loss of ozone has created a hole over antarctica.	problematic
723	substitution statement 1: infancy is the period of most rapid growth after birth . statement 2: learning begins in infancy . hint: after learning birth . </s>	after birth, learning begins . </s>	learning begins after birth.	3	perfect match
748	substitution statement 1: milk is a nutritious fluid . statement 2: milk shakes have milk . hint: is nutritious a . </s>	milkshakes are a nutritious fluid . </s>	shakes are a nutritious fluid.	2	almost good
774	substitution statement 1: puberty is the period during which humans become sexually mature . statement 2: breasts develop during puberty . hint: become the sexually mature humans breasts period during develop . </s>	the breasts develop during the period when humans become sexually mature . </s>	breasts develop during the period during which humans become sexually mature.	3	good
777	substitution statement 1: a circle graph can be used to display percents . statement 2: fractions are sometimes expressed as a percent . hint: circle fractions a graph can display used be to . </s>	a circle graph can be used to display fractions . </s>	a circle graph can be used to display fractions.	3	exact match
803	substitution statement 1: satellite technology is used for predicting the weather . statement 2: today, technology has helped meteorologists to detect tornadoes . hint: meteorologists tornadoes detect to . </s>	meteorologists use satellites to detect tornadoes . </s>	meteorologists can detect tornadoes.	1	missing important information	satellite not included in hints?
819	substitution statement 1: safety goggles are used for protecting the eyes during experiments . statement 2: safety goggles are mandatory in the laboratory . hint: laboratory the are in experiments . </s>	experiments are performed in the laboratory . </s>	the laboratory is required for protecting the eyes during experiments.	1	not reasonable
830	substitution statement 1: cnidarians are invertebrates such as jellyfish and corals . statement 2: invertebrates have no vertebrae or backbone . hint: and backbone jellyfish corals no or vertebrae have . </s>	jellyfish and corals have no vertebrae or backbone . </s>	jellyfish and corals have no vertebrae or backbone.	3	perfect match
850	substitution statement 1: hermit crabs use the shells of dead snails for homes . statement 2: students live at home or in group homes . hint: of the live crabs shells snails dead in . </s>	hermits crabs use dead snails shells as their place to live . </s>	crabs use the shells of dead snails to live.	2	almost good
865	substitution statement 1: volcanic ash in the atmosphere decreases the temperature by blocking the sun . statement 2: ash clouds are a particular problem for aircraft . hint: for the are particular aircraft volcanic clouds atmosphere in . </s>	volcanic clouds in the atmosphere is a particular problem for aircraft . </s>	volcanic clouds in the atmosphere are a particular problem for aircraft.	3	perfect match
871	substitution statement 1: a seismograph is used for measuring the size of an earthquake . statement 2: magnitude a measure of earthquake size . hint: of measure magnitude . </s>	a seismograph measures the magnitude of earthquakes . </s>	a seismograph can measure the magnitude of an earthquake.	3	perfect match
912	substitution statement 1: a stopwatch is used to measure time . statement 2: all times are measured in seconds . hint: is measure stopwatch a used seconds to . </s>	a stopwatch is used to measure seconds . </s>	a stopwatch is used to measure seconds.	3	perfect match
914	substitution statement 1: kidney failure may be treated with dialysis . statement 2: dialysis dialysis is a way of cleaning the blood with an artificial kidney . hint: artificial failure blood with kidney an . </s>	kidney failure may be treated by cleaning the blood with an artificial kidney . </s>	kidney failure may be treated with an artificial kidney.	2	missing some information	leading to multiple possible statements
921	substitution statement 1: kidney failure may be treated with dialysis . statement 2: dialysis dialysis is a way of cleaning the blood with an artificial kidney . hint: artificial failure the cleaning blood with kidney an . </s>	kidney failure may be treated by cleaning the blood with an artificial kidney . </s>	kidney failure may be treated with a way of cleaning the blood with an artificial kidney.	problematic
924	substitution statement 1: kidney failure may be treated with dialysis . statement 2: kidney failure is a death sentence . hint: death dialysis . </s>	a lack of dialysis may lead to death . </s>	death can be treated with dialysis.	1	not reasonable	hard, need completely rephrase to make it make sense.
3	substitution statement 1: climate is generally described in terms of temperature and moisture . statement 2: climate change is a global problem . hint: is moisture and temperature . </s>	temperature and moisture is changing globally . </s>	temperature and moisture are a global problem.	1	not reasonable
10	substitution statement 1: a vehicle is used for transportation . statement 2: passenger vehicles are the primary mode of transportation . hint: is transportation of mode a passenger . </s>	passenger cars are used for transportation . </s>	passenger mode of transportation is passenger mode.	1	not reasonable
23	substitution statement 1: collar cells have tiny hairs that trap the particles . statement 2: some cells have tiny hair-like fibers that are called flagella . hint: that particles the cells flagella collar trap have . </s>	collar cells have flagella that trap the particles . </s>	collar cells have fibers that trap the particles that trap the particles.	1	missing important information
27	substitution statement 1: collar cells have tiny hairs that trap the particles . statement 2: collar cells each have a flagellum . hint: particles hairs tiny flagellum . </s>	flagellum are tiny hairs that trap particles . </s>	flagellum has tiny hairs that trap particles.	3
30	substitution statement 1: all cnidarians are aquatic . statement 2: aquatic creatures live in the water, for example . hint: cnidarians live all in . </s>	all cnidarians live in water . </s>	all cnidarians live in the water.	3
32	substitution statement 1: all cnidarians are aquatic . statement 2: aquatic creatures live in the water, for example . hint: cnidarians all live . </s>	all cnidarians live in the water . </s>	all cnidarians live.	problematic data
66	substitution statement 1: friction is used for stopping a vehicle by brakes . statement 2: friction produces heat . hint: brakes a heat stopping by . </s>	stopping a vehicle with brakes will generate heat . </s>	brakes can produce heat.	2
100	substitution statement 1: when a gas in an open container evaporates , that gas spreads out into the air . statement 2: evaporation is when a liquid turns into a gas . hint: liquid air the spreads a container open gas into an in . </s>	when a liquid turns into a gas in an open container, it spreads out into the air . </s>	when a gas in an open container evaporates, that gas spreads out into the air	1	missing important information
110	substitution statement 1: bone is less flexible than cartilage but stronger . statement 2: cartilage is more flexible and lighter in weight than bone . hint: is bone than more cartilage . </s>	bone is stronger and more rigid than cartilage . </s>	bone is more weight dense than bone.	1
126	substitution statement 1: rna is a small molecule that can squeeze through pores in the nuclear membrane . statement 2: nuclear membranes are thickened, rounded and slightly irregular . hint: molecule rounded rna pores can through irregular slightly . </s>	rna is a small molecule that can squeeze through thickened, rounded and slightly irregular pores . </s>	rna can squeeze through pores in something rounded, slightly irregular.	3	semantically the same
145	substitution statement 1: lymph is a fluid that leaks out of capillaries into spaces between cells . statement 2: lymph nodes, or glands, filter the lymph fluid . hint: lymph is . </s>	lymph is filtered by nodes . </s>	lymph is a fluid that leaks out of capillaries into spaces between cells.	problematic data
225	substitution statement 1: protozoa make humans sick when they become human parasites . statement 2: malaria parasites are transmitted by mosquitos . hint: humans make malaria protozoa sick . </s>	malaria is a protozoa that make humans sick . </s>	protozoa make humans sick.	problematic data
232	substitution statement 1: natural magnetism is used for pointing north by a compass . statement 2: compasses point to the magnetic poles . hint: is poles the natural magnetism magnetic used point to . </s>	natural magnetism is used to point to the magnetic poles . </s>	natural magnetism is used to point to the magnetic poles.	3
238	substitution statement 1: nonmetal elements are far fewer in number . statement 2: each element is either a metal, nonmetal, or metalloid . hint: elements fewer are or far number metalloid in . </s>	elements that are not metal or metalloid are far fewer in number . </s>	metalloids are far fewer in number.	1
245	substitution statement 1: blood type is important for medical reasons . statement 2: blood type is determined by inherited antigens and antibodies . hint: important reasons for antigens inherited medical . </s>	inherited antigens and antibodies are important for medical reasons . </s>	inherited antigens is important for medical reasons.	2	missing some information
249	substitution statement 1: scientists still know relatively little about archaea . statement 2: scientist do research every year . hint: archaea little do about still research . </s>	people that do research still know relatively little about archaea . </s>	still do research about archaea.	1
274	substitution statement 1: some pelycosaurs gave rise to a group of animals called therapsids . statement 2: pelycosaurs are an important lineage preserved in the fossil record . hint: lineage of the record fossil therapsids . </s>	the fossil record shows the lineage of therapsids . </s>	therapsids have a lineage preserved in the fossil record.	problematic data
285	substitution statement 1: howling is used to warn other wolves by wolves . statement 2: wolves communicate with each other using the different pitches of their howl . hint: using other pitches different wolves by warn . </s>	wolves warn other wolves by using different pitches . </s>	howling is used to warn other wolves by using different pitches.	2	not perfect but not unacceptable
343	substitution statement 1: absorption of nutrients occurs mainly in the small intestine . statement 2: dozens of drugs inhibit nutrient absorption or deplete nutrients . hint: drugs of the small . </s>	many drugs can inhibit the actions of the small intestine . </s>	drugs can deplete nutrients in the small intestine.	1
409	substitution statement 1: adolescence is the last stage of life before adulthood . statement 2: adolescence begins with puberty . hint: stage adulthood begins before of the last life with puberty . </s>	puberty begins the last stage of life before adulthood . </s>	the last stage of life before adulthood begins with puberty.	3	semantically the same
411	substitution statement 1: adolescence is the last stage of life before adulthood . statement 2: adolescence is a pivotal stage of human development . hint: human is adulthood before of a development pivotal last stage . </s>	the last stage before adulthood is a pivotal later stage of human development . </s>	a pivotal stage of human development is the last stage of life before adulthood.	3	semantically the same
421	substitution statement 1: a speedometer is used for giving a driver feedback on the speed of their vehicle . statement 2: speedometer now shows maximum speed of 90 mph . hint: mph the a driver speedometer . </s>	speedometer shows the driver the vehicle's mph . </s>	a driver can use a speedometer to see what is a speed of 90	1
456	substitution statement 1: a compass is used to navigate oceans . statement 2: on moonless nights they navigate solely with the geomagnetic compass . hint: on moonless oceans nights . </s>	oceans can be navigated even on moonless nights . </s>	on moonless nights they navigate oceans.	2
467	substitution statement 1: a compass is used to navigate oceans . statement 2: large ocean-going vessels use a gyrocompass as their steering compass . hint: steering used compass . </s>	compasses are used for steering . </s>	steering compass is used to navigate.	1
472	substitution statement 1: precipitation increases moisture . statement 2: rain is liquid precipitation . hint: moisture rain . </s>	rain increases moisture . </s>	rain increases moisture.	3
480	substitution statement 1: a spider web is used to capture food by spiders . statement 2: black widow spiders construct funnel-shaped webs . hint: capture webs black food to . </s>	black widows use webs to capture food . </s>	black widows use webs to capture food.	3
485	substitution statement 1: a spider web is used to capture food by spiders . statement 2: spider spiders have eight legs . hint: eight capture by food to . </s>	webs are built to capture food by eight legged creatures . </s>	eight legs are used to capture food by humans.	1
510	substitution statement 1: bees convert nectar into honey . statement 2: honey bees are very social in that they all live together in home, or apiary . hint: apiary honey into nectar in . </s>	nectar is converted into honey in an apiary . </s>	nectar converts nectar into honey in apiary.	1
528	substitution statement 1: mountains are formed by earthquakes . statement 2: earthquakes earthquakes are the results of moving plates . hint: plates moving by mountains . </s>	mountains are formed by moving plates . </s>	mountains are formed by moving plates.	3
536	substitution statement 1: chemical digestion occurs mainly in the small intestine . statement 2: chemical digestion breaks complex chemicals into simple ones . hint: chemicals small mainly complex simple into ones in intestine . </s>	breaking complex chemicals into simple ones occurs mainly in the small intestine . </s>	complex chemicals are broken into simple ones mainly in the small intestine.	3
570	substitution statement 1: any surface that has not been sterilized is likely to be covered with bacteria . statement 2: bacteria are the smallest of microscopic organisms . hint: surface is that been sterilized has covered with microscopic likely not organisms any be to . </s>	any surface that has not been sterilized is likely to be covered with microscopic organisms . </s>	any surface that has not been sterilized is likely to be covered with microscopic organism	3
585	substitution statement 1: differentiation is the process by which unspecialized cells become specialized . statement 2: cells are the basic unit of life . hint: is unspecialized process basic differentiation of the become specialized which by life . </s>	differentiation is the process by which unspecialized basic units of life become specialized . </s>	differentiation is the process by which unspecialized units of life become specialized.	3
597	substitution statement 1: ancestors of hagfish are thought to have been the earliest vertebrates . statement 2: vertebrates are animals with backbones . hint: hagfish animals been thought of the ancestors are with earliest have to . </s>	ancestors of hagfish are thought to have been the earliest animals with backbones . </s>	ancestors of hagfish are thought to have been the earliest animals with back	2	probably because the length of the generated sequence is limited.
614	substitution statement 1: when a metal rusts , that metal becomes orange on the surface . statement 2: rust stains are the result of oxidation . hint: surface of the a metal result on oxidation becomes orange . </s>	metal becomes orange on the surface as a result of oxidation . </s>	when a metal stains, the metal becomes orange on the surface.	1
640	substitution statement 1: measuring the hardness of minerals requires scratching those materials . statement 2: calcite is a very common mineral . hint: materials hardness calcite of the requires those scratching measuring . </s>	measuring the hardness of calcite requires scratching those materials . </s>	measuring the hardness of calcite requires scratching those materials.	3
658	substitution statement 1: seat belts are used for preventing injuries to passengers in cars . statement 2: seat belts save lives . hint: lives preventing passengers injuries cars in to . </s>	preventing injuries to passengers in cars saves lives . </s>	preventing injuries to passengers in cars save lives.	3
702	substitution statement 1: loss of ozone has created an ozone hole over antarctica . statement 2: another sign of global warming is a hole in the ozone layer over antarctica . hint: has warming hole created ozone global an . </s>	global warming has created an ozone hole . </s>	loss of ozone has created an ozone hole over global warming.	1
704	substitution statement 1: loss of ozone has created an ozone hole over antarctica . statement 2: ozone ozone is a natural component of the atmosphere . hint: of has antarctica a natural the over hole created loss component atmosphere . </s>	loss of a natural component of the atmosphere has created a hole over antarctica . </s>	loss of a natural component of the atmosphere has created a hole over antarctica	3
740	substitution statement 1: food is easier to chew because it is moistened by saliva from the salivary glands . statement 2: brain food bagels are brain food . hint: bagels to easier chew saliva . </s>	bagels get easier to chew by being moistened by saliva from the salivary glands . </s>	bagels are easier to chew because of saliva.	2
751	substitution statement 1: birth may be followed by a period of parental care of the offspring . statement 2: parents take care of children . hint: parents offspring birth . </s>	birth may be followed by parental nurturing . </s>	parents may have a baby.	problematic data
779	substitution statement 1: a circle graph can be used to display percents . statement 2: percents are decimal fractions . hint: circle decimal fractions can used be to . </s>	circle graphs can be used to show decimal fractions . </s>	circle graphs can be used to display decimal fractions.	3
784	substitution statement 1: a circle graph can be used to display percents . statement 2: percents are decimal fractions . hint: circle decimal fractions a can graph display used be to . </s>	a circle graph can be used to display decimal fractions . </s>	a circle graph can be used to display decimal fractions.	problematic data
822	substitution statement 1: safety goggles are used for protecting the eyes during experiments . statement 2: eyes eyes eyes are probably the most important symbolic sensory organ . hint: goggles sensory during safety experiments . </s>	sensory organs can be protected by safety goggles during experiments . </s>	safety goggles are used for protecting sensory organs during experiments.	3
823	substitution statement 1: safety goggles are used for protecting the eyes during experiments . statement 2: safety goggles are mandatory in the laboratory . hint: for the mandatory eyes in . </s>	protection for the eyes is mandatory in the laboratory . </s>	the eyes are protected in the laboratory.	1
825	substitution statement 1: safety goggles are used for protecting the eyes during experiments . statement 2: safety glasses and goggles protect the eyes . hint: eyes for protecting the glasses are during used safety experiments . </s>	safety glasses are used for protecting the eyes during experiments . </s>	glasses are used for protecting the eyes during experiments.	1
828	substitution statement 1: cnidarians are invertebrates such as jellyfish and corals . statement 2: cnidarians are entirely aquatic animals . hint: aquatic jellyfish . </s>	jellyfish are an aquatic invertebrate . </s>	jellyfish are aquatic animals.	problematic data
852	substitution statement 1: hermit crabs use the shells of dead snails for homes . statement 2: gastropods are snails and slugs . hint: gastropods crabs shells hermit . </s>	hermit crabs use shells of gastropods for homes . </s>	hermit crabs use shells of gastropods for homes.	3
867	substitution statement 1: volcanic ash in the atmosphere decreases the temperature by blocking the sun . statement 2: or a veil of tiny particles from a volcanic eruption can block the sun . hint: block the can sun . </s>	volcanoes can block the sun . </s>	ash in the atmosphere can block the sun.	problematic data
902	substitution statement 1: fingernails prevent injury by forming protective plates over the ends of the fingers . statement 2: fingernails are also made of keratin . hint: plates keratin protective injury fingers of the over by forming ends . </s>	keratin prevents injury by forming protective plates over the ends of the fingers . </s>	keratin prevent injury by forming protective plates over the ends of the fingers.	3
916	substitution statement 1: kidney failure may be treated with dialysis . statement 2: dialysis is a procedure to filter the blood . hint: failure the a filter may procedure blood with treated kidney be to . </s>	kidney failure may be treated with a procedure to filter the blood . </s>	kidney failure may be treated with a procedure to filter the blood.	3
	split 1	split 2	total
total	50	50	100
problematic	5	8	13
perfect	23	20	43
acceptable	7	6	13
unacceptable	15	16	31
